# Supplementary material for: Outcome of spinal implant-associated infections treated with or without biofilm-active antibiotics: results from a 10-year cohort study
Source: Springer Nature journal article supplement (doi:10.1007/s15010-020-01435-2), 2020-05-05
Supplement: MOESM1 [file 17955724]

# Pocket Guide to Diagnosis & Treatment of Spinal Infections

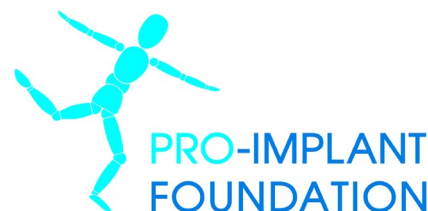

Version 3: March 2020

For individual consultations and workshops contact our Consultation Portal at: [cp.pro-implant.org](http://cp.pro-implant.org)

## DEFINITION

**Vertebral osteomyelitis** is confirmed, if the following 3 criteria are fulfilled:

| Investigation                   | Criteria                                                                                                                    |
|---------------------------------|-----------------------------------------------------------------------------------------------------------------------------|
| Clinical features               | Acute or chronic back pain                                                                                                  |
| Imaging                         | Computed tomography (CT) or magnetic resonance imaging (MRI) consistent with vertebral osteomyelitis                        |
| Microbiology<br>or<br>Histology | Microbial growth in blood culture or vertebral tissue <sup>1</sup><br><br>Acute or chronic inflammation in vertebral tissue |

**Implant-associated spinal infection** is confirmed, if  $\geq 1$  criterion is fulfilled:

| Investigation     | Criteria                                                                                                                                                                                                 |
|-------------------|----------------------------------------------------------------------------------------------------------------------------------------------------------------------------------------------------------|
| Clinical features | <ul style="list-style-type: none"><li>• Wound healing disturbance or sinus tract (fistula)</li><li>• Visible purulence around the implant</li><li>• Positive „probe to implant“ test</li></ul>           |
| Histology         | Inflammation in peri-implant tissue                                                                                                                                                                      |
| Microbiology      | Significant microbial <sup>2</sup> growth in: <ul style="list-style-type: none"><li>• <math>\geq 2</math> peri-implant tissue samples</li><li>• Sonication fluid (<math>\geq 50</math> CFU/ml)</li></ul> |

<sup>1</sup> Low virulent skin pathogens must be interpreted in the clinical context (prior infiltrations? Intravascular device present?)

<sup>2</sup> For highly virulent organisms (e.g. *S. aureus*, *E. coli*, streptococci) or patients under antibiotics already one positive sample confirms infection and  $< 50$  CFU/ml in sonication can be significant

## Supportive criteria for infection:

- Prolonged discharge from wound
- Secondary wound dehiscence
- Loosening of the implant/screws
- Non-union (pseudarthrosis)

## PATHOGENESIS

| Post-interventional                                                                                                                                                 | Hematogenous                                                                                                                                                                                                                                                                       | Contiguous                                                                                                                                                                               |
|---------------------------------------------------------------------------------------------------------------------------------------------------------------------|------------------------------------------------------------------------------------------------------------------------------------------------------------------------------------------------------------------------------------------------------------------------------------|------------------------------------------------------------------------------------------------------------------------------------------------------------------------------------------|
| <p>After</p> <ul style="list-style-type: none"> <li>• Surgery/instrumentation</li> <li>• Spinal infiltration/injections</li> <li>• Open/CT-guided biopsy</li> </ul> | <ul style="list-style-type: none"> <li>• Primary bacteremia/sepsis</li> <li>• Urosepsis</li> <li>• Endocarditis/infected intravascular device</li> <li>• Dental focus (abscess/after interventions)</li> <li>• Pulmonary infection</li> <li>• Abdominal infection/tumor</li> </ul> | <ul style="list-style-type: none"> <li>• Skin infection</li> <li>• Pressure ulcer</li> <li>• Gastrointestinal sinus tract (oesophagus, intestine)</li> <li>• Aortic infection</li> </ul> |

## CLASSIFICATION

|                                                                                                                                          | Acute spinal infection                                                                                            | Chronic spinal infection                                                                                                         |
|------------------------------------------------------------------------------------------------------------------------------------------|-------------------------------------------------------------------------------------------------------------------|----------------------------------------------------------------------------------------------------------------------------------|
| <p>Pathogenesis</p> <ul style="list-style-type: none"> <li>▪ Post-interventional</li> <li>▪ Hematogenous <u>or</u> contiguous</li> </ul> | <p>&lt;6 weeks after intervention (early)</p> <p>&lt;6 weeks of symptom duration</p>                              | <p>≥6 weeks after intervention (delayed/low-grade)</p> <p>≥6 weeks of symptom duration</p>                                       |
| <p>Clinical features</p>                                                                                                                 | <p>Acute pain, fever, prolonged wound discharge (&gt;7-10 days), acute neurologic impairment</p>                  | <p>Chronic pain, loosening/dislocation of the implant, sinus tract (fistula), neurologic impairment</p>                          |
| <p>Causative microorganism</p>                                                                                                           | <p>High-virulent:<br/><i>Staphylococcus aureus</i>,<br/><i>Streptococcus</i> spp.,<br/>gram-negative bacteria</p> | <p>Low-virulent:<br/>Coagulase-negative staphylococci, <i>Cutibacterium</i> (formerly <i>Propionibacterium</i>) <i>acnes</i></p> |

# MANAGEMENT ALGORITHM

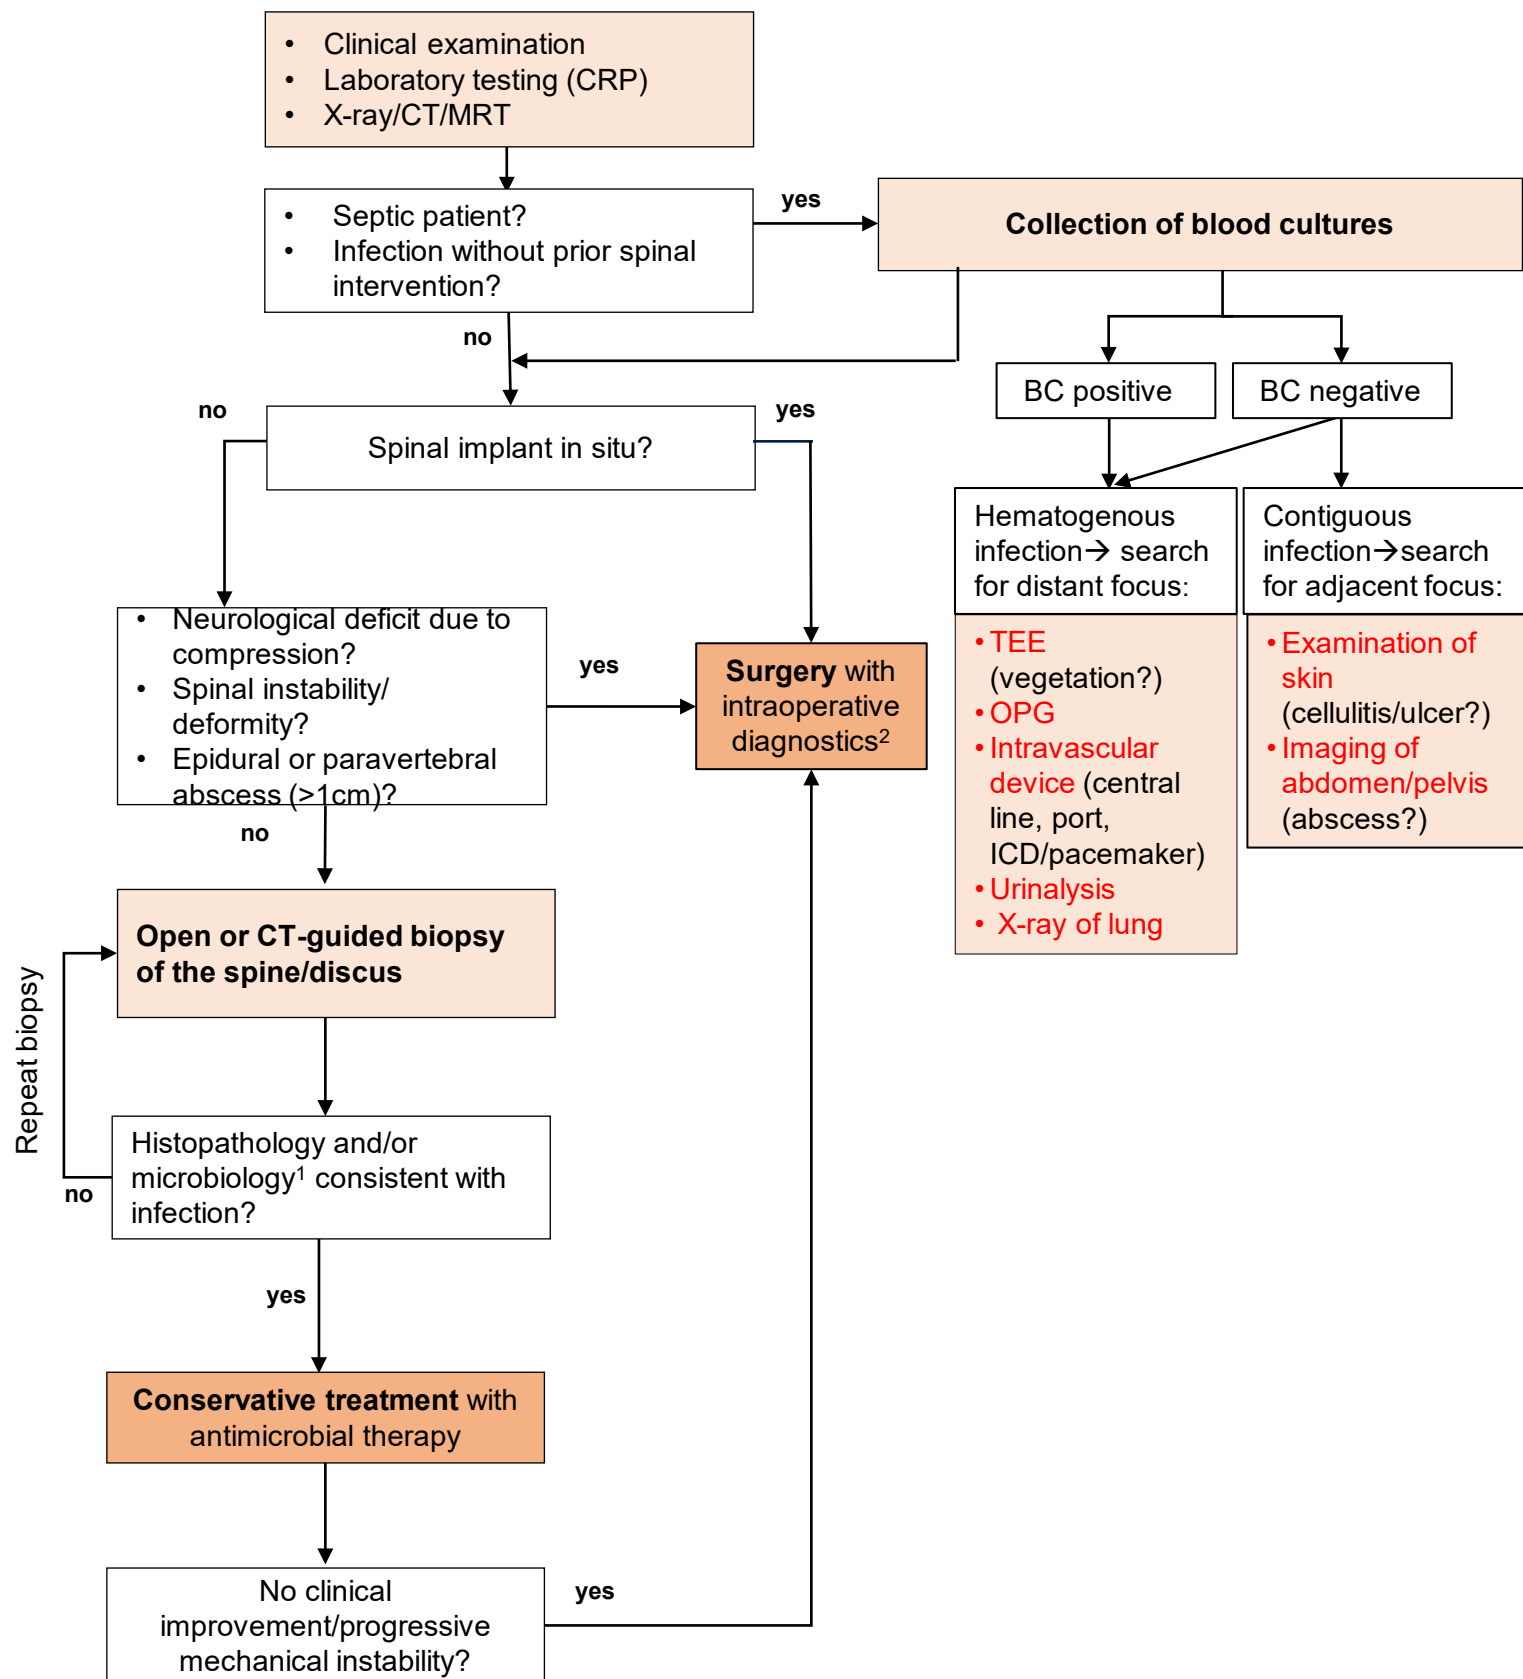

<sup>1</sup> For highly virulent organisms (e.g. *S. aureus*, *E. coli*, *streptococcus spp.*) or for patients on antibiotic therapy one positive sample confirms infection, for low-virulent organisms (e.g. *S. epidermidis*, *C. acnes*)  $\geq 2$  positive samples are required to confirm infection.

<sup>2</sup> See procedures on the following page. Histopathology, microbiology (+/- sonication), additional microbiological investigations (Mycobacteria, Brucella), if exposure/risk factors present.

TEE: transesophageal echocardiography, OPG: orthopantomogram, BC: blood cultures

# SURGICAL PROCEDURES FOR IMPLANT ASSOCIATED SPINAL INFECTIONS

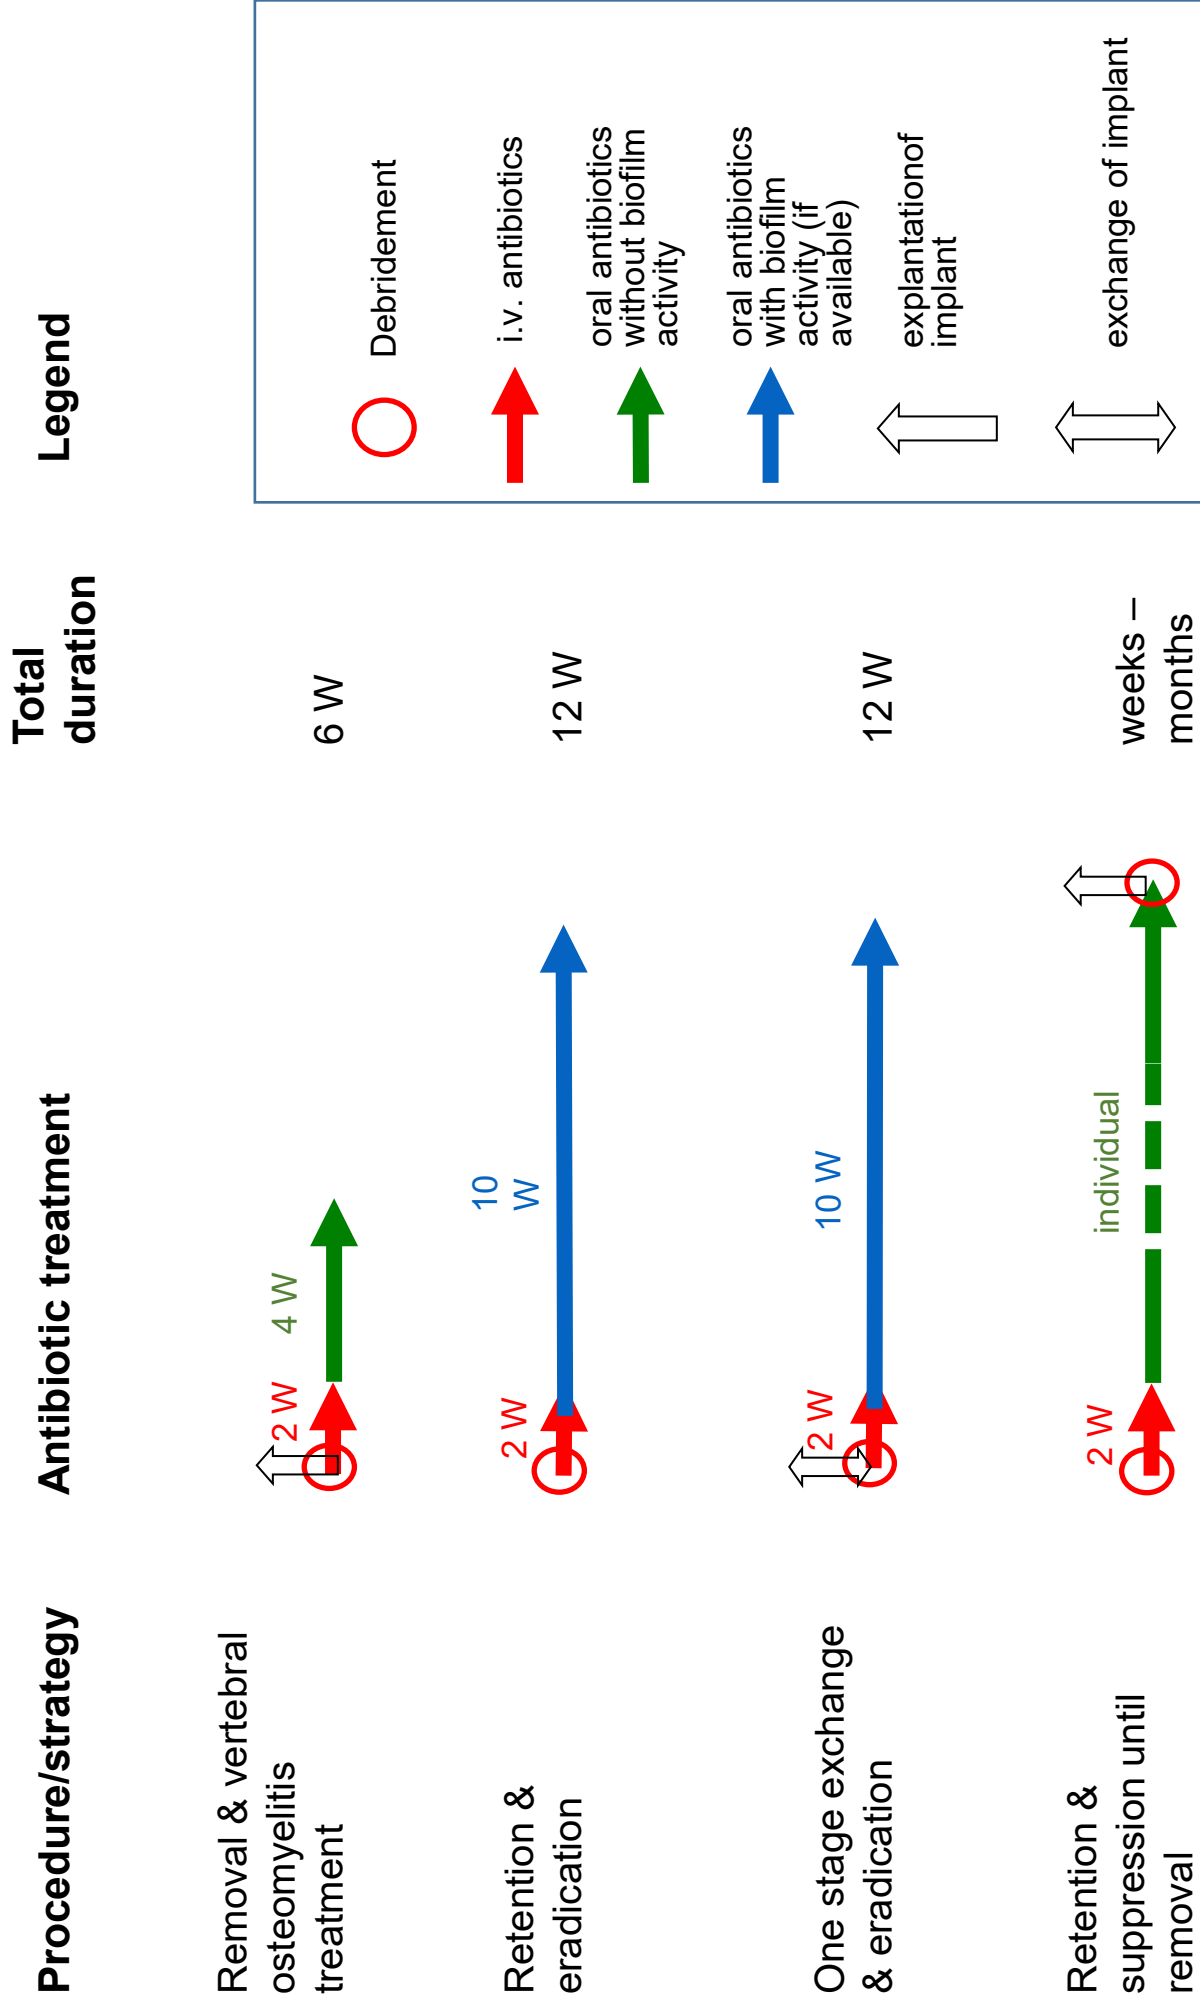

# TREATMENT ALGORITHM FOR IMPLANT-ASSOCIATED SPINAL INFECTIONS

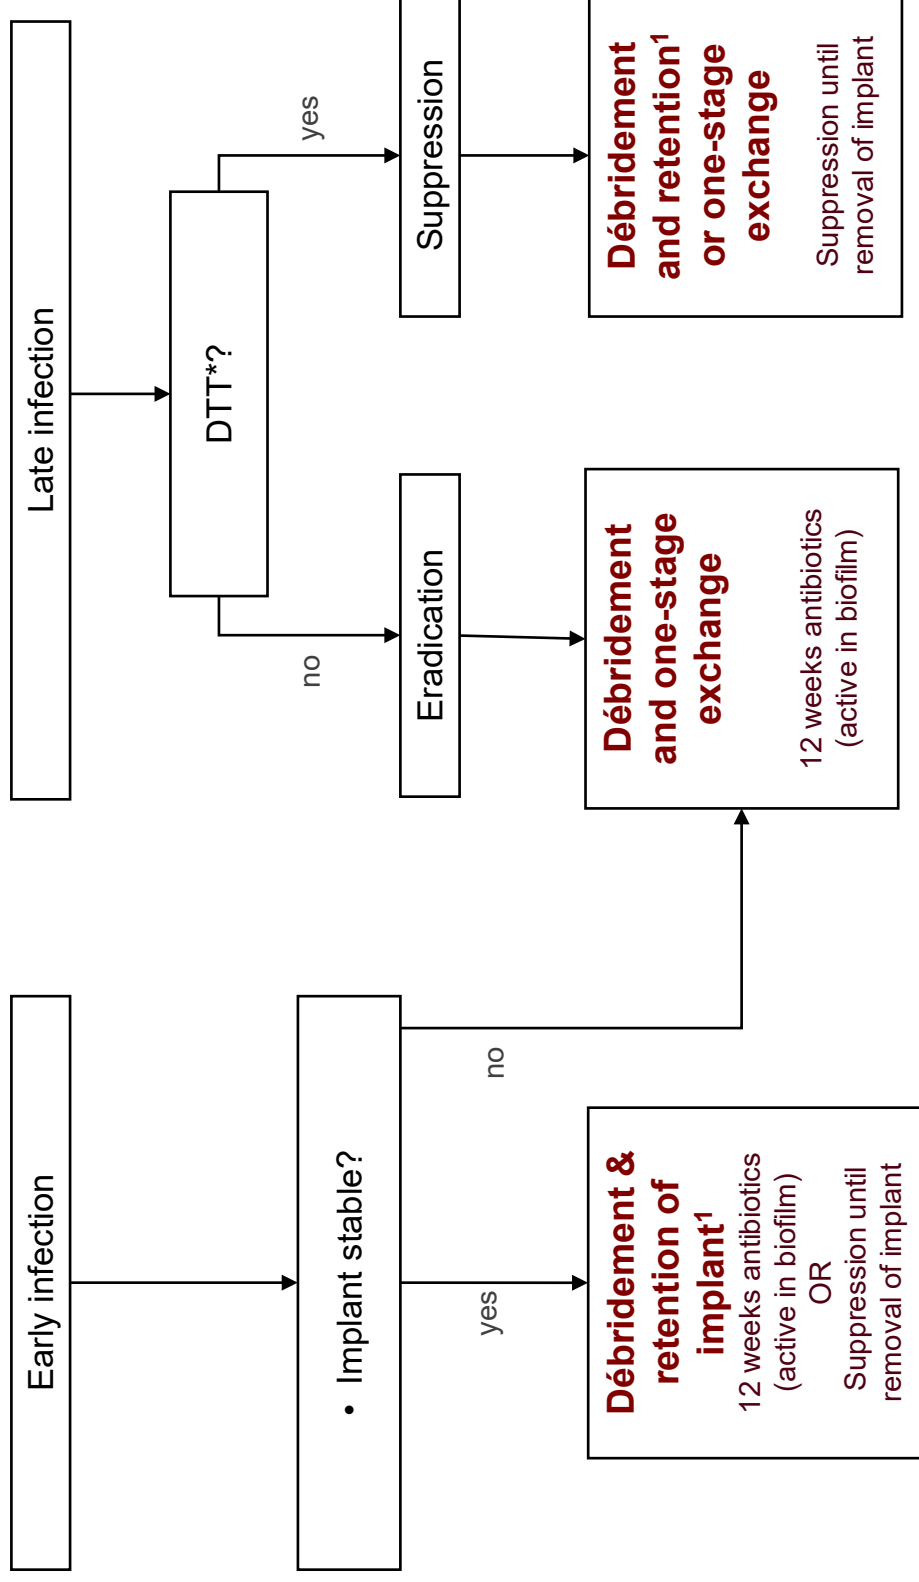

\* DTT = difficult-to-treat, caused by pathogens resistant to biofilm-active antimicrobials:  
 - Rifampin-resistant staphylococci  
 - Ciprofloxacin-resistant gram-negative bacteria  
 - Fungi (Candida)

<sup>1</sup> exchange all loose parts (screws) if possible

# RECOMMENDED ANTIMICROBIAL TREATMENT

## Empiric therapy (intravenous):

| Clinical situation                                            | Primary focus                                          | 1 <sup>st</sup> choice                                                         | Alternative                                                    |
|---------------------------------------------------------------|--------------------------------------------------------|--------------------------------------------------------------------------------|----------------------------------------------------------------|
| <b>Hematogenous vertebral osteomyelitis (without implant)</b> | Without known primary focus                            | Ampicillin/Sulbactam <sup>a</sup> 3 x 3 g                                      | + Fosfomycin 3 x 5 g (severe infection)                        |
|                                                               | Infectious endocarditis suspected                      | Ampicillin/Sulbactam <sup>a</sup> 4 x 3 g + Gentamicin <sup>e</sup> 1 x 240 mg | Ampicillin/Sulbactam <sup>a</sup> 4 x 3 g + Fosfomycin 3 x 5 g |
|                                                               | Primary focus in urogenital tract or abdomen suspected | Piperacillin/Tazobactam 3 x 4.5 g                                              | Meropenem 3 x 1 g                                              |
|                                                               | Allergy to penicillins:<br>- non-Type 1                | Cefuroxim 3 x 1.5 g                                                            | Meropenem 3 x 1 g                                              |
|                                                               | - Type 1 (anaphylaxis)                                 | Vancomycin <sup>d</sup> 2 x 1g + Fosfomycin 3 x 5g                             | Daptomycin 1 x 8 mg/kg+ + Fosfomycin 3 x 5g                    |
| <b>Post-interventional spinal infection (+/- implant)</b>     | First revision                                         | Ampicillin/Sulbactam <sup>a</sup> 3 x 3g + Fosfomycin 3 x 5g                   | Cefuroxim 3 x 1.5 g + Vancomycin <sup>d</sup> 2x1g             |
|                                                               | Multiple previous revisions                            | Piperacillin/Tazobactam 3 x 4.5g + Fosfomycin 3 x 5g                           | Vancomycin <sup>d</sup> 2 x 1g + Fosfomycin 3 x 5 g            |

## Targeted eradication therapy (deescalate as soon as the pathogen is known):

| Microorganism<br>(red: difficult-to-treat)             | Antibiotic (check pathogen susceptibility before)                                                                                       | Dose <sup>b</sup> (blue: renal adjustment needed) | Route                |
|--------------------------------------------------------|-----------------------------------------------------------------------------------------------------------------------------------------|---------------------------------------------------|----------------------|
| <b>Staphylococcus spp.</b>                             |                                                                                                                                         |                                                   |                      |
| - Oxacillin-/methicillin-susceptible                   | Flucloxacillin <sup>a</sup> (+/- Fosfomycin)<br>for 2 weeks, followed by (according to susceptibility)                                  | 4 x 2 g<br>(3 x 5 g)                              | i.v.<br>i.v.         |
|                                                        | Rifampin <sup>c</sup> +                                                                                                                 | 2 x 450 mg                                        | p.o.                 |
|                                                        | - Levofloxacin or                                                                                                                       | 2 x 500 mg                                        | p.o.                 |
|                                                        | - Cotrimoxazole or                                                                                                                      | 3 x 960 mg                                        | p.o.                 |
|                                                        | - Doxycycline or                                                                                                                        | 2 x 100 mg                                        | p.o.                 |
|                                                        | - Fusidic acid                                                                                                                          | 3 x 500 mg                                        | p.o.                 |
| - Oxacillin-/methicillin-resistant                     | Daptomycin or Vancomycin <sup>d</sup> (+/- Fosfomycin)<br>for 2 weeks, followed by an oral <b>rifampin</b> combination as above         | 1 x 8 mg/kg<br>2 x 1 g<br>(3 x 5 g)               | i.v.<br>i.v.<br>i.v. |
| - <b>Rifampin-resistant</b>                            | Intravenous treatment according susceptibility for 2 weeks (as above), followed by long-term suppression for ≥1 year (e.g. Doxycycline) |                                                   |                      |
| <b>Streptococcus spp.</b>                              |                                                                                                                                         |                                                   |                      |
|                                                        | Penicillin G <sup>a</sup> or Ceftriaxone<br>for 2-3 weeks, followed by:                                                                 | 4 x 5 million U<br>1 x 2 g                        | i.v.<br>i.v.         |
|                                                        | Amoxicillin or Doxycycline (suppression ≥1 y.)                                                                                          | 3 x 1000 mg<br>2 x 100 mg                         | p.o.<br>p.o.         |
| <b>Enterococcus spp.</b>                               |                                                                                                                                         |                                                   |                      |
| - Penicillin-susceptible                               | Ampicillin + Gentamicin <sup>e</sup> (+/- Fosfomycin)<br>for 2-3 weeks, followed by:                                                    | 4 x 2 g<br>1 x 120 mg<br>(3 x 5 g)                | i.v.<br>i.v.<br>i.v. |
|                                                        | Amoxicillin                                                                                                                             | 3 x 1000 mg                                       | p.o.                 |
| - <b>Penicillin-resistant or allergy to penicillin</b> | Vancomycin <sup>d</sup> or Daptomycin + Gentamicin <sup>e</sup>                                                                         | 2 x 1 g<br>1 x 10 mg/kg<br>1 x 120 mg             | i.v.<br>i.v.<br>i.v. |

|                                                                                                         |                                                                                                                                                                                    |                                                             |                                      |
|---------------------------------------------------------------------------------------------------------|------------------------------------------------------------------------------------------------------------------------------------------------------------------------------------|-------------------------------------------------------------|--------------------------------------|
|                                                                                                         | (+/- Fosfomycin)<br>for 2-4 weeks, followed by                                                                                                                                     | (3 x 5 g)                                                   | i.v.                                 |
|                                                                                                         | Linezolid (max. 4 weeks)                                                                                                                                                           | 2 x 600 mg                                                  | p.o.                                 |
| - <b>Vancomycin-resistant (VRE)</b>                                                                     | Individual; removal of the implant <u>or</u> life-long suppression necessary (e.g. with Doxycycline)                                                                               |                                                             |                                      |
| <b>Gram-negative</b>                                                                                    |                                                                                                                                                                                    |                                                             |                                      |
| - Enterobacteriaceae<br>( <i>E. coli</i> , <i>Klebsiella</i> ,<br><i>Enterobacter</i> etc.)             | Ciprofloxacin <sup>f</sup>                                                                                                                                                         | 2 x 750 mg                                                  | p.o.                                 |
| - Nonfermenters<br>( <i>Pseudomonas aeruginosa</i> ,<br><i>Acinetobacter</i> spp.)                      | Piperacillin/tazobactam or<br>Meropenem or<br>Ceftazidim/Cefepime<br>+Tobramycin<br>(or gentamicin)<br>for 2-3 weeks, followed by:                                                 | 3 x 4.5 g<br>3 x 1 g<br>3 x 2 g<br>1 x 300 mg<br>1 x 240 mg | i.v.<br>i.v.<br>i.v.<br>i.v.<br>i.v. |
| - multiresistant                                                                                        | Depending on susceptibility: a combination of meropenem 3 x 1 g i.v., colistin 3 x 3 million U i.v. and/or fosfomycin 3 x 5 g i.v., consider oral suppression (if <b>Cipro-R</b> ) | 2 x 750 mg                                                  | p.o.                                 |
| <b>Anaerobes</b>                                                                                        |                                                                                                                                                                                    |                                                             |                                      |
| - Gram-positive<br>( <i>Cutibacterium</i> ,<br><i>Peptostreptococcus</i> ,<br><i>Finegoldia magna</i> ) | Penicillin G <sup>a</sup> or<br>Ceftriaxon<br>for 2 weeks, followed by:                                                                                                            | 4 x 5 million U<br>1 x 2 g                                  | i.v.<br>i.v.                         |
|                                                                                                         | Rifampin <sup>c</sup> +<br>Levofloxacin or<br>Amoxicillin                                                                                                                          | 2 x 450 mg<br>2 x 500 mg<br>3 x 1000 mg                     | p.o.<br>p.o.<br>p.o.                 |
| - Gram-negative<br>( <i>Bacteroides</i> )                                                               | Ampicillin/sulbactam <sup>a</sup><br>for 2 weeks, followed by<br>Metronidazol                                                                                                      | 3 x 3 g<br>3 x 400 mg or 500 mg                             | i.v.<br>p.o.                         |
| <b>Candida spp.</b>                                                                                     |                                                                                                                                                                                    |                                                             |                                      |
| - <b>Fluconazole-susceptible</b>                                                                        | Caspofungin <sup>g</sup> or<br>Anidulafungin<br>for 2 weeks, followed by:<br>Fluconazole<br>(suppression for ≥1 year)                                                              | 1 x 70 mg<br>1 x 100mg (1. Day 200mg)<br>1 x 400 mg         | i.v.<br>i.v.<br>p.o.                 |
| - <b>Fluconazole-resistant</b>                                                                          | Individual (e.g. with voriconazole 2 x 200 mg p.o.); removal of the implant or long-term suppression                                                                               |                                                             |                                      |
| <b>Culture-negative</b>                                                                                 |                                                                                                                                                                                    |                                                             |                                      |
|                                                                                                         | Ampicillin/sulbactam <sup>a</sup><br>for 2 weeks, followed by:                                                                                                                     | 3 x 3 g                                                     | i.v.                                 |
|                                                                                                         | Rifampin <sup>c</sup> +<br>Levofloxacin                                                                                                                                            | 2 x 450 mg<br>2 x 500 mg                                    | p.o.<br>p.o.                         |

<sup>a</sup> **Penicillin allergy** NON-type 1 (e.g. skin rash): cefazolin (3 x 2 g i.v.). In case of anaphylaxis (= type 1-allergy such as Quincke's edema, anaphylactic shock) or cephalosporin allergy: vancomycin (2 x 1 g i.v.) or daptomycin (1 x 8 mg/kg i.v.) Ampicillin/sulbactam is equivalent to amoxicillin/clavulanic acid (3 x 1.2 g or 3 x 2.2 g i.v.)

<sup>b</sup> **Laboratory testing** 2x weekly: leukocytes, CRP, creatinine/eGFR, liver enzymes (AST and ALT). Dose-adjustment according to renal function and body weight (<40 or >100kg)

<sup>c</sup> **Rifampin** is administered only when a newimplant is in situ. Add it orally to i.v.-treatment as soon as wounds are dry; in patients aged >75 years, rifampin is reduced (2 x 300 mg).

<sup>d</sup> Check **Vancomycin** concentration at least 1x/week(take blood before next dose); therapeutic range: 15-20 µg/ml

<sup>e</sup> Give gentamicin only, if **gentamicin high-level (HL)** is tested susceptible (consult your microbiology laboratory). In gentamicin HL-resistant *E. faecalis* or patients with impaired renal function: gentamicin is exchanged with ceftriaxone 1 x 2 g i.v. or Fosfomycin 3 x 5 g i.v.

<sup>f</sup> Add **i.v. treatment** (piperacillin/tazobactam 3 x 4.5 g or ceftriaxon 1x 2 g or meropenem 3 x 1 g i.) in the first postoperative days (until wound is dry)

<sup>g</sup> In patients weighing <80 kg: a loading dose of 70 mg on day 1, then **reduce to 50 mg** from day 2.

## Oral therapy in vertebral osteomyelitis WITHOUT implant

| Microorganism                          | Antibiotic (according to susceptibility, for dose see table above) |
|----------------------------------------|--------------------------------------------------------------------|
| <i>S. aureus</i>                       | Rifampin combination (see above)                                   |
| Coagulase-negative staphylococci       | Cotrimoxazole or doxycycline or clindamycin                        |
| <i>Streptococcus</i> spp. <sup>1</sup> | Amoxicillin or clindamycin or doxycycline                          |
| <i>Enterococcus</i> spp. <sup>1</sup>  | Amoxicillin (or linezolid, if resistant to amoxicillin)            |
| Anaerobes (gram-positive)              | Clindamycin or amoxicillin                                         |
| Anaerobes (gram-negative)              | Metronidazole or clindamycin                                       |
| Gram-negative bacilli                  | Ciprofloxacin or cotrimoxazole                                     |
| Fungi ( <i>Candida</i> spp.)           | Fluconazole (voriconazole if fluconazole resistant)                |

<sup>1</sup> Consider longer intravenous treatment (4 weeks) in *S. agalactiae*, *S. dysgalactiae* and enterococci.

### Treatment duration:

- Native spinal infection (WITHOUT Implant): 6 weeks (in most cases but longer, if non-drained abscess)
- Implant associated spinal infection: 12 weeks (in most cases)

### Follow-up:

- clinical and laboratory (CRP) course
- NO scheduled CT or MRT imaging, only if new symptoms occur or clinical course is unfavorable

## INVESTIGATION OF PRIMARY FOCUS

| Pathogen                   | Primary focus                                                       | Investigation                                                                                                                       |                                                                                                                                                             |
|----------------------------|---------------------------------------------------------------------|-------------------------------------------------------------------------------------------------------------------------------------|-------------------------------------------------------------------------------------------------------------------------------------------------------------|
| <b>Staphylococcus</b> spp. | <i>S. aureus</i>                                                    | <ul style="list-style-type: none"> <li>• Skin lesions/furunculosis</li> <li>• Endocarditis</li> <li>• Primary bacteremia</li> </ul> | <ul style="list-style-type: none"> <li>• Skin examination</li> <li>• Blood cultures</li> <li>• Transesophageal echocardiography (TEE)</li> </ul>            |
|                            | Coagulase-negative staphylococci                                    | <ul style="list-style-type: none"> <li>• Intravascular implant</li> <li>• Endocarditis</li> </ul>                                   | <ul style="list-style-type: none"> <li>• Blood cultures, TEE</li> <li>• Intravascular implant in situ?</li> </ul>                                           |
| <b>Streptococcus</b> spp.  | Viridans group ( <i>S. mitis/oralis</i> )                           | <ul style="list-style-type: none"> <li>• Oral cavity</li> <li>• Endocarditis</li> </ul>                                             | <ul style="list-style-type: none"> <li>• Orthopantomogram</li> <li>• Blood cultures, TEE</li> <li>• Recent dental procedure?</li> </ul>                     |
|                            | <i>S. agalactiae</i> ,<br><i>S. dysgalactiae</i>                    | <ul style="list-style-type: none"> <li>• Abdomen</li> <li>• Urogenital tract</li> <li>• Skin</li> <li>• Oral cavity</li> </ul>      | <ul style="list-style-type: none"> <li>• Imaging of abdomen/pelvis</li> <li>• Urinalysis</li> <li>• Skin examination</li> <li>• Orthopantomogram</li> </ul> |
|                            | <i>S. gallolyticus</i> (formerly <i>bovis</i> )                     | <ul style="list-style-type: none"> <li>• Colon carcinoma /adenoma</li> </ul>                                                        | <ul style="list-style-type: none"> <li>• Colonoscopy</li> </ul>                                                                                             |
| <b>Enterococcus</b> spp.   | <i>E. faecalis</i> ,<br><i>E. faecium</i>                           | <ul style="list-style-type: none"> <li>• Abdomen</li> <li>• Urogenital tract</li> <li>• Endocarditis</li> </ul>                     | <ul style="list-style-type: none"> <li>• Imaging of abdomen/pelvis</li> <li>• Urinalysis</li> <li>• Blood cultures, TEE</li> </ul>                          |
| <b>Gram-negative rods</b>  | <i>E. coli</i> ,<br><i>Klebsiella</i> ,<br><i>Enterobacter</i> spp. | <ul style="list-style-type: none"> <li>• Abdomen</li> <li>• Urogenital tract</li> </ul>                                             | <ul style="list-style-type: none"> <li>• Imaging of abdomen/pelvis</li> <li>• Urinalysis</li> <li>• (Colonoscopy)</li> </ul>                                |
